# Supplementary figures and images for: Transcriptome Analysis of Needle and Root of Pinus Massoniana in Response to Continuous Drought Stress
Source: MDPI journal article supplement (doi:10.3390/plants10040769), 2021-04-14

**a**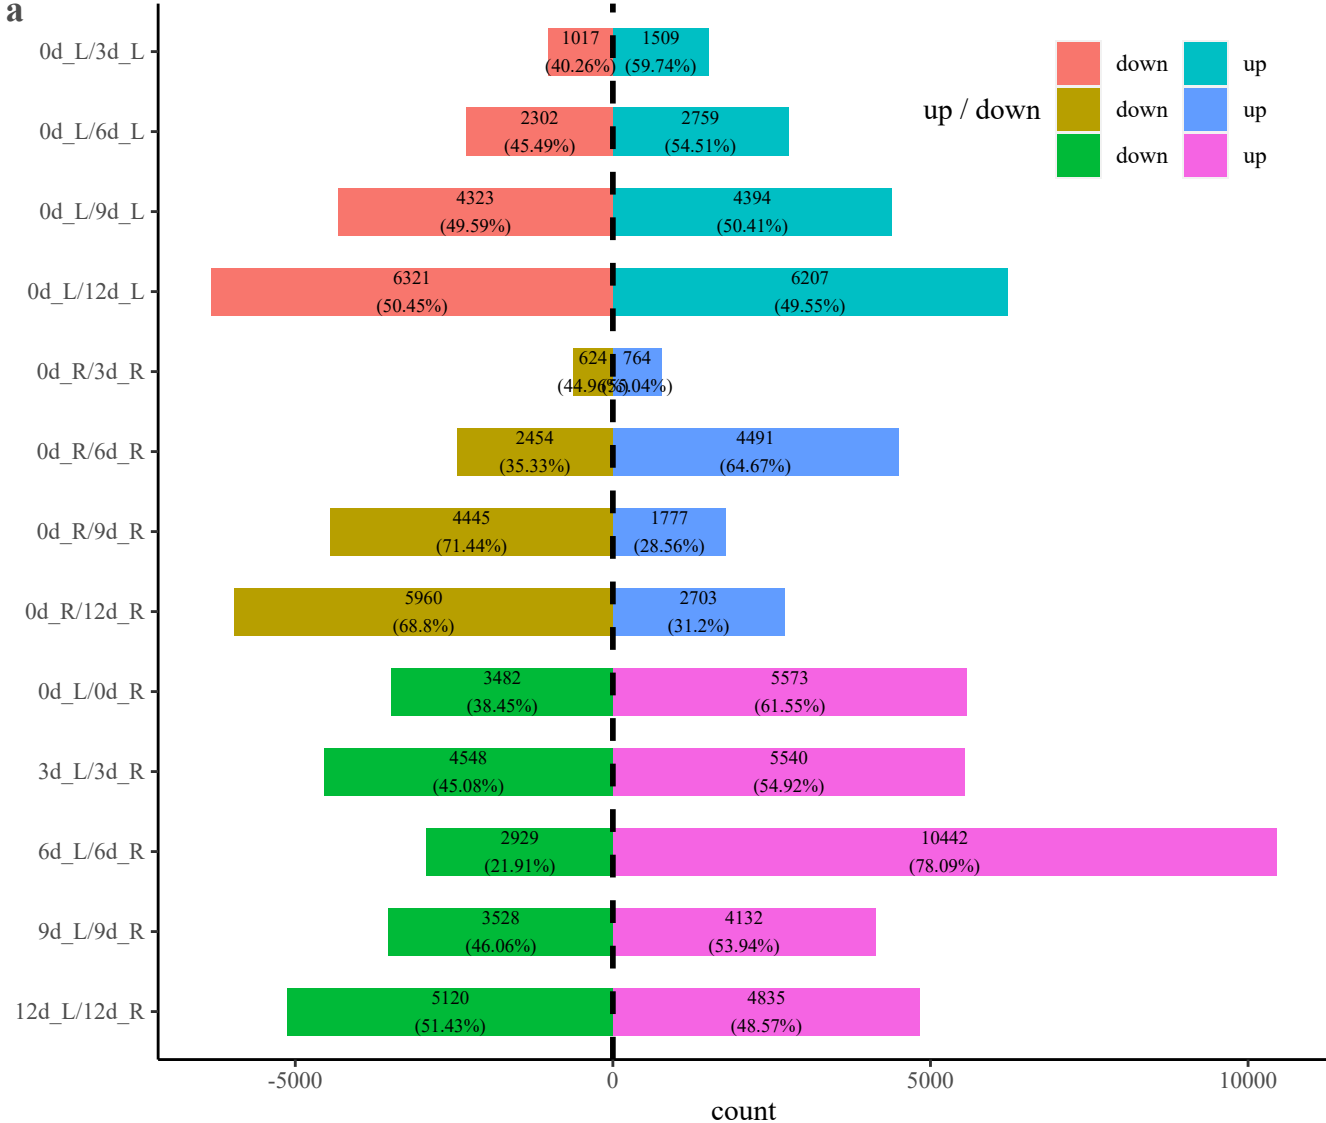

Supplement: s1 [file s1]

**a**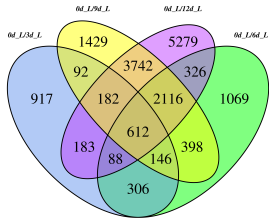**b**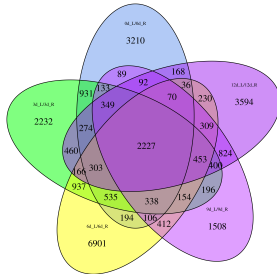**c**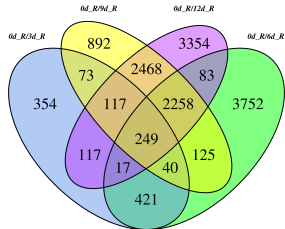

Supplement: s1 [file s1]

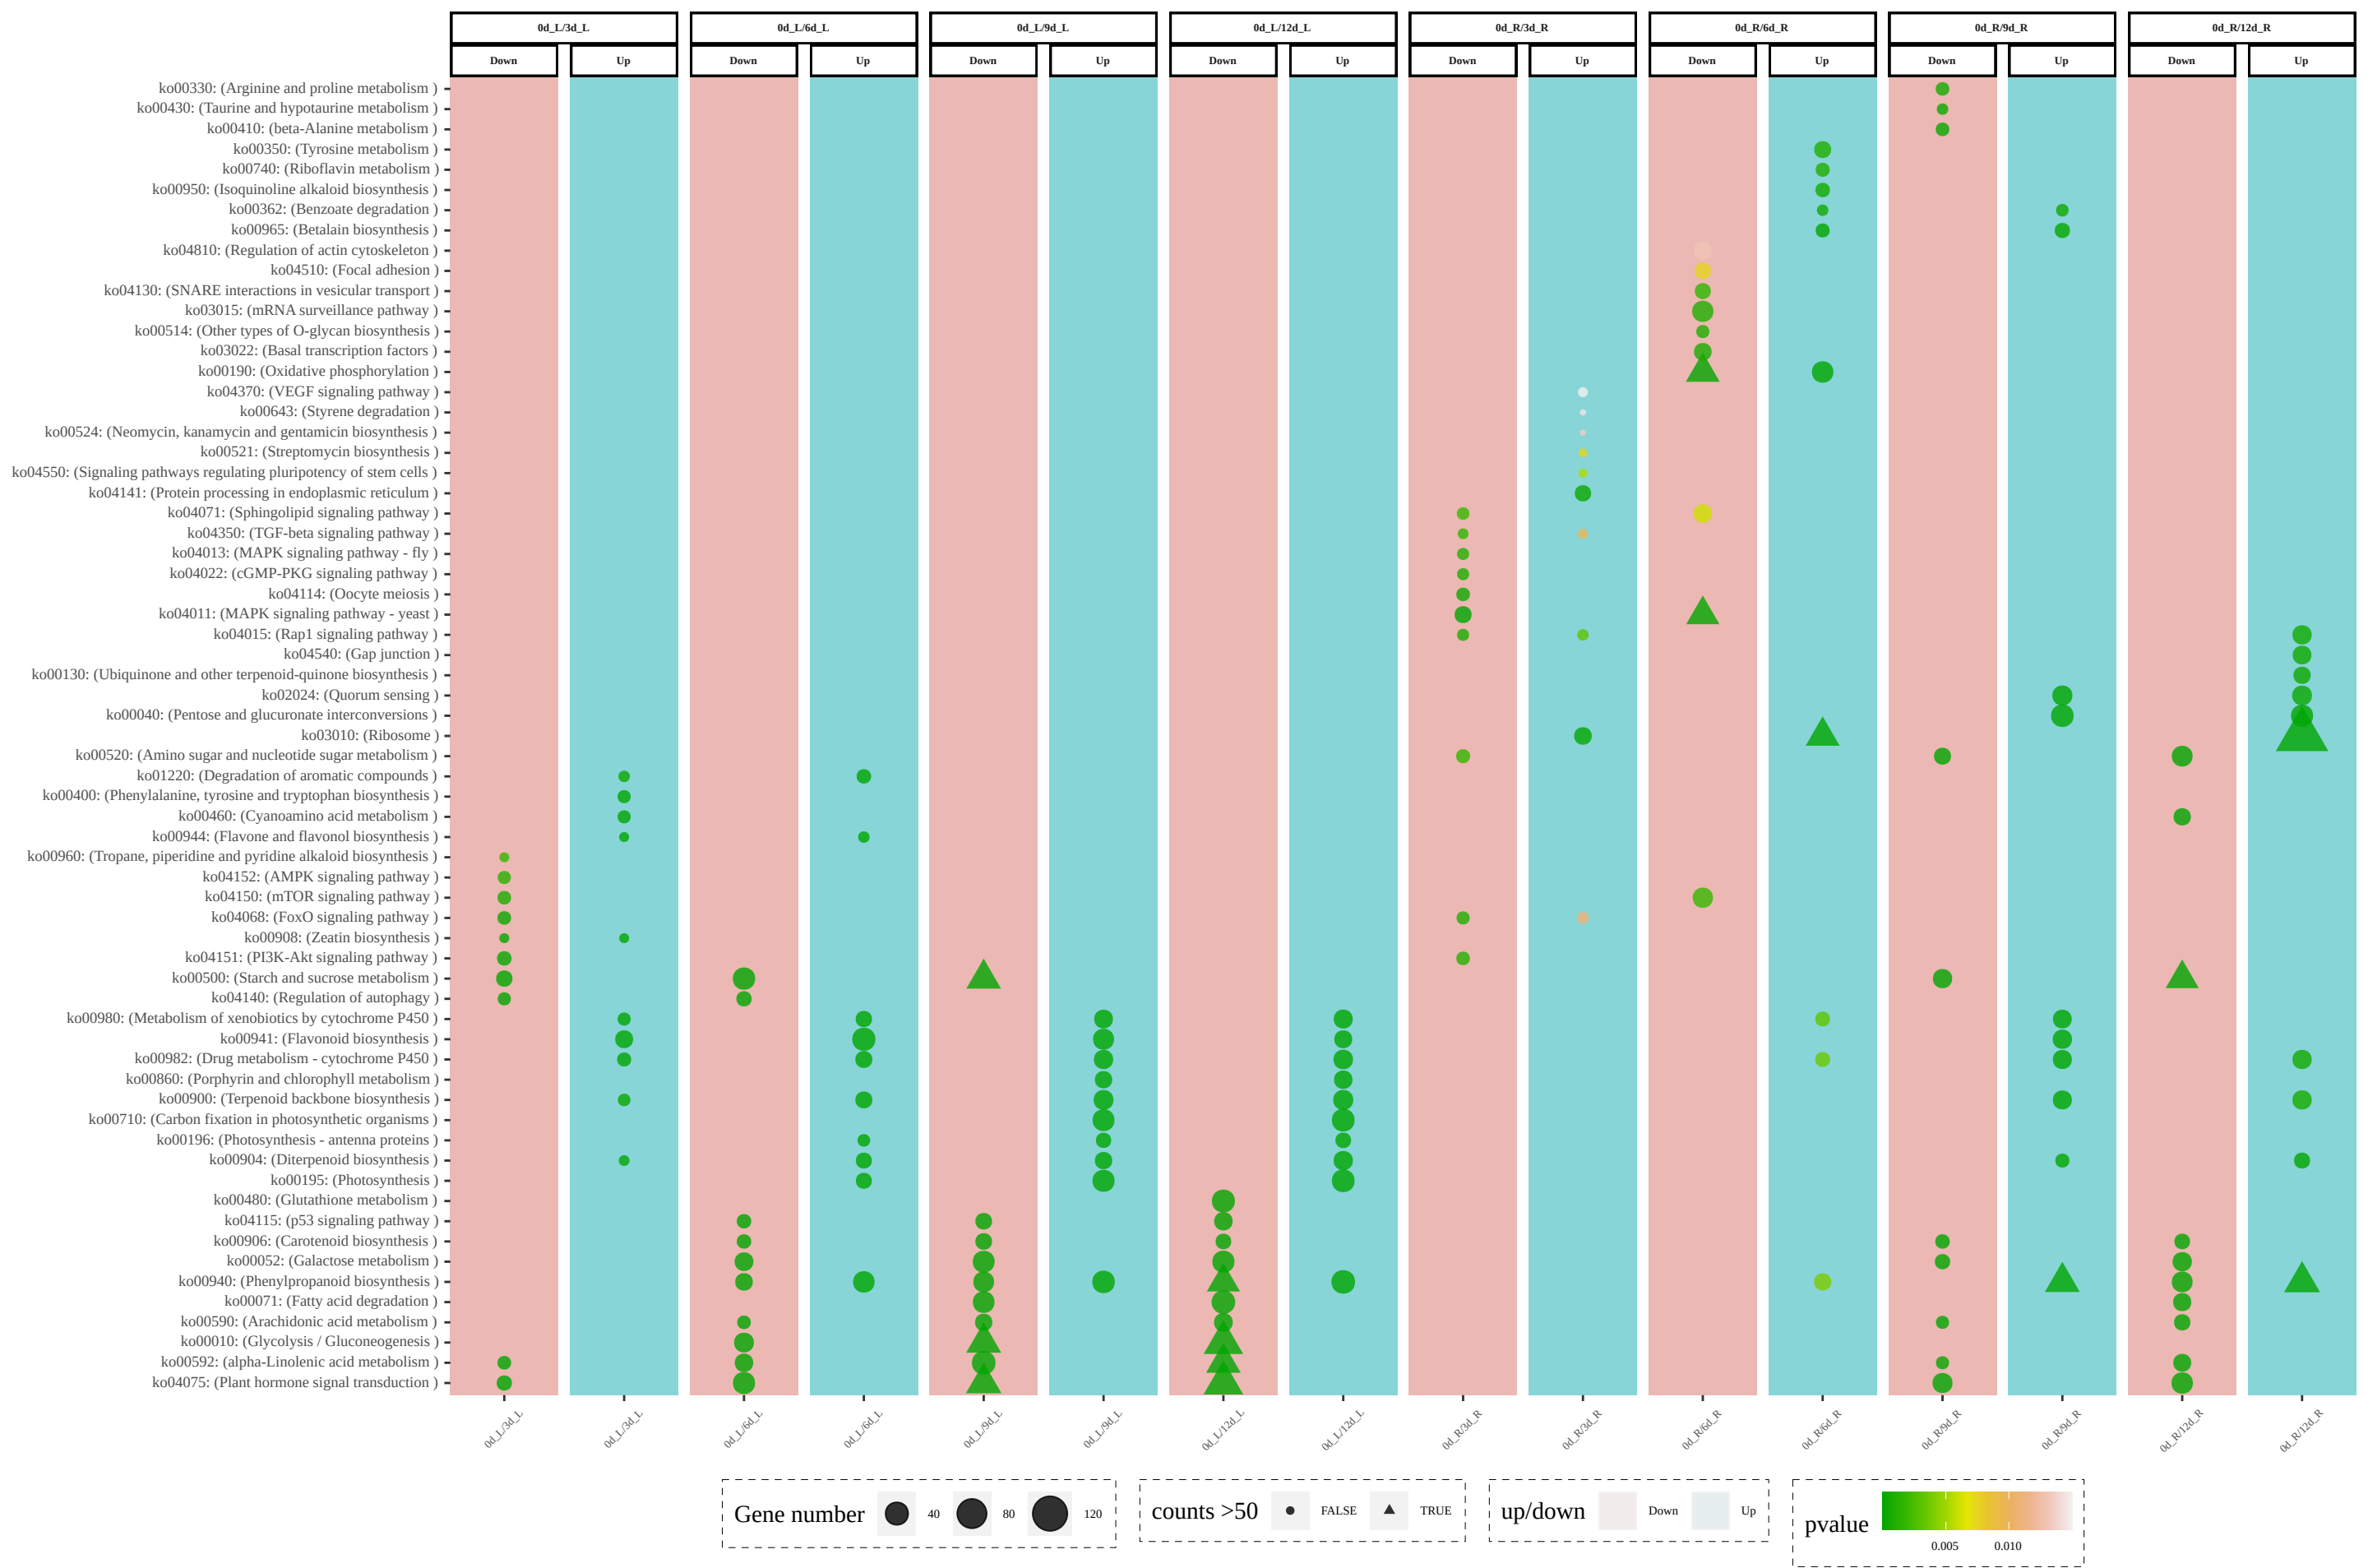

Supplement: s1 [file s1]
